# Supplementary material
Source: PubMed Central journal article supplement (PMC6009860)
Supplement: IENZ_A_1250756_SM5525.pdf [file IENZ_A_1250756_SM5525.pdf]

## Supplementary Materials

**Investigation of PDE5/PDE6 and PDE5/PDE11 Selective Potent Tadalafil-like PDE5 Inhibitors Using Combination of Molecular Modeling Approaches, Molecular Fingerprint-Based Virtual Screening Protocols and Structure-based Pharmacophore Development**

**Gülru Kayık<sup>1,2</sup>, Nurcan Ş. Tüzün<sup>1</sup>, Serdar Durdagi<sup>3,\*</sup>**

<sup>1</sup>Department of Chemistry, Istanbul Technical University, Istanbul, Turkey

<sup>2</sup>Department of Pharmacy, University of Pisa, Via Bonanno, 6, 56126, Pisa, Italy

<sup>3</sup>Department of Biophysics, School of Medicine, Bahcesehir University, Istanbul, Turkey

\* E-mail: serdar.durdagi@med.bau.edu.tr

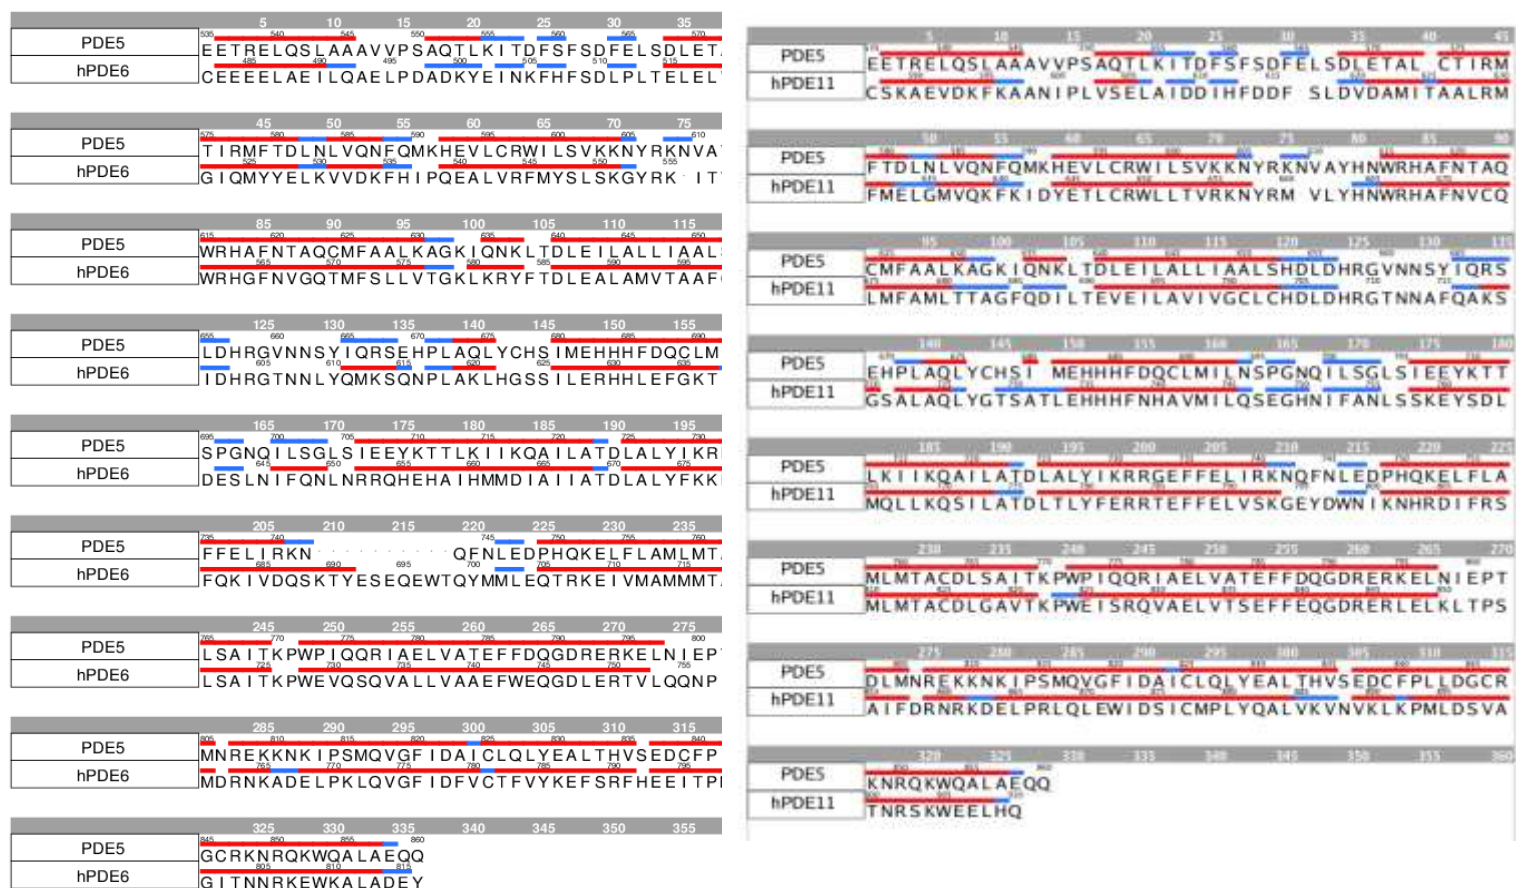

**Figure S1.** Amino acid sequence alignments of PDE6 and PDE11 over PDE5 catalytic site residues. Alignment procedure was achieved with Blosum62 matrix via MOE software.

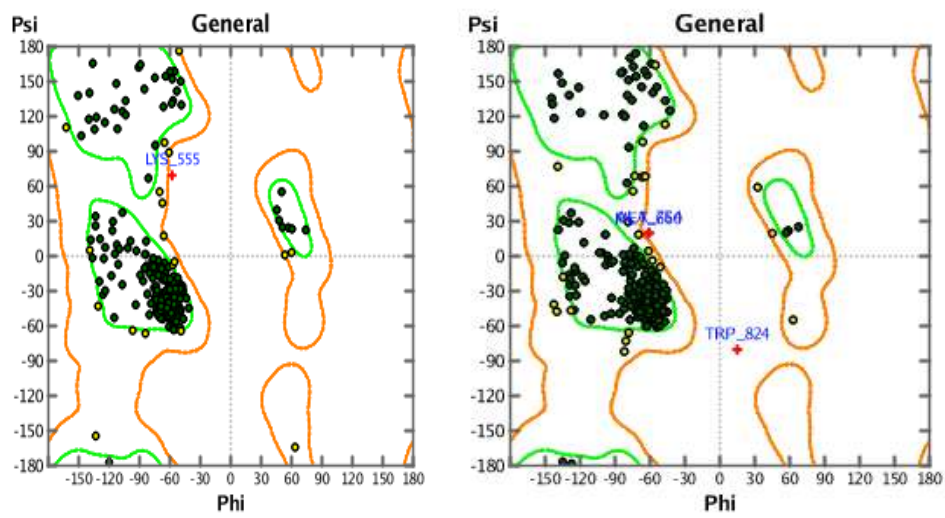

**Figure S2.** Ramachandran plots of the homology models of PDE6 and PDE11.

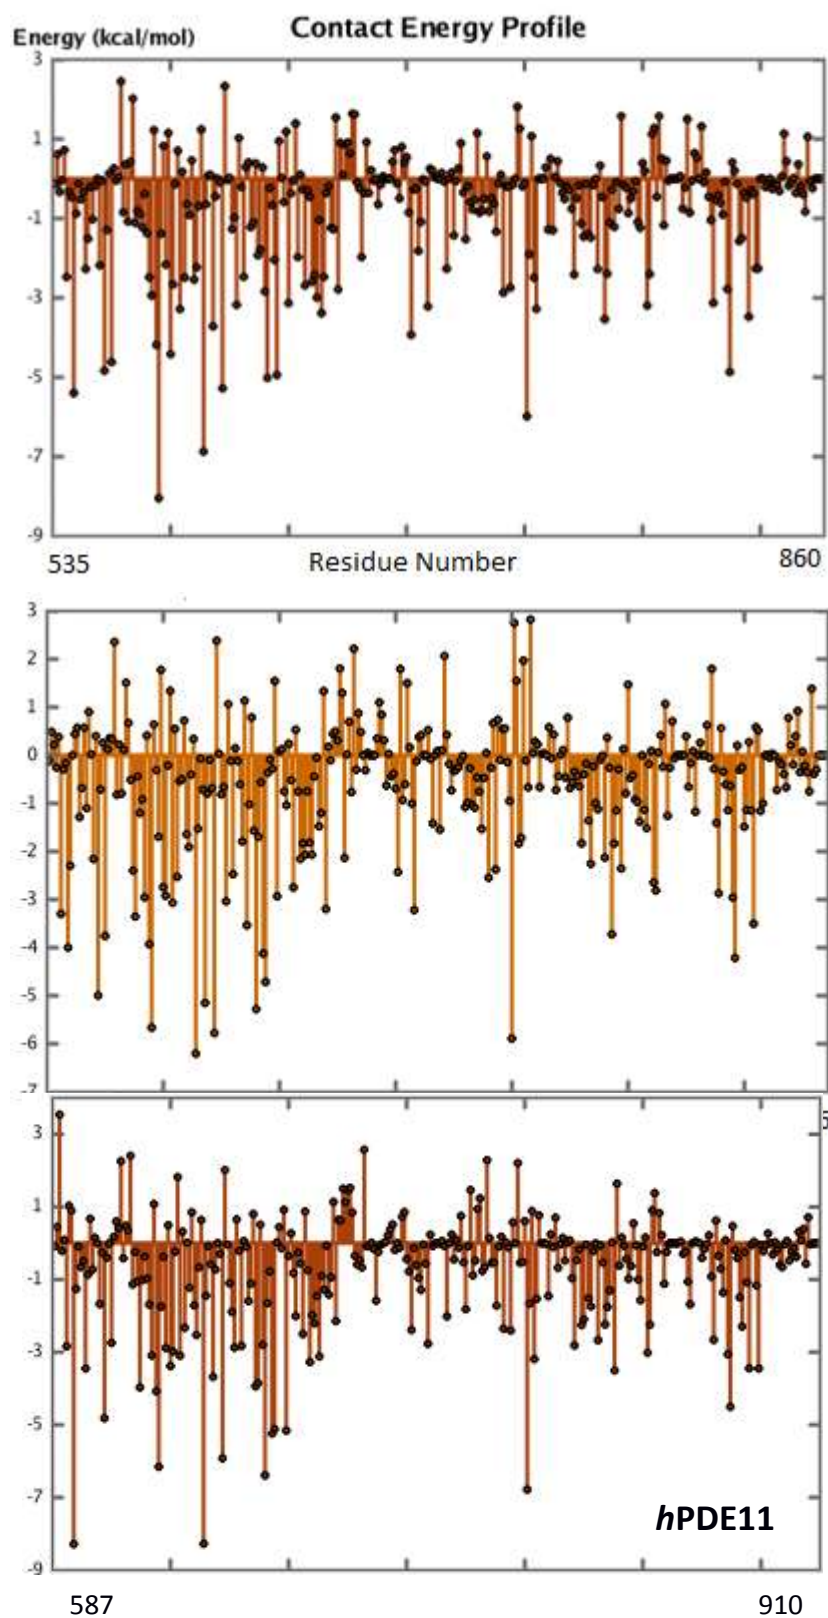

**Figure S3.** Contact Energy Profiles of the catalytic side residues that correspond to PDE5, PDE6 and PDE11. The x axis and y axis represent the aminoacid residues numbering and atom-atom contact pair energies in kcal/molunit, respectively.

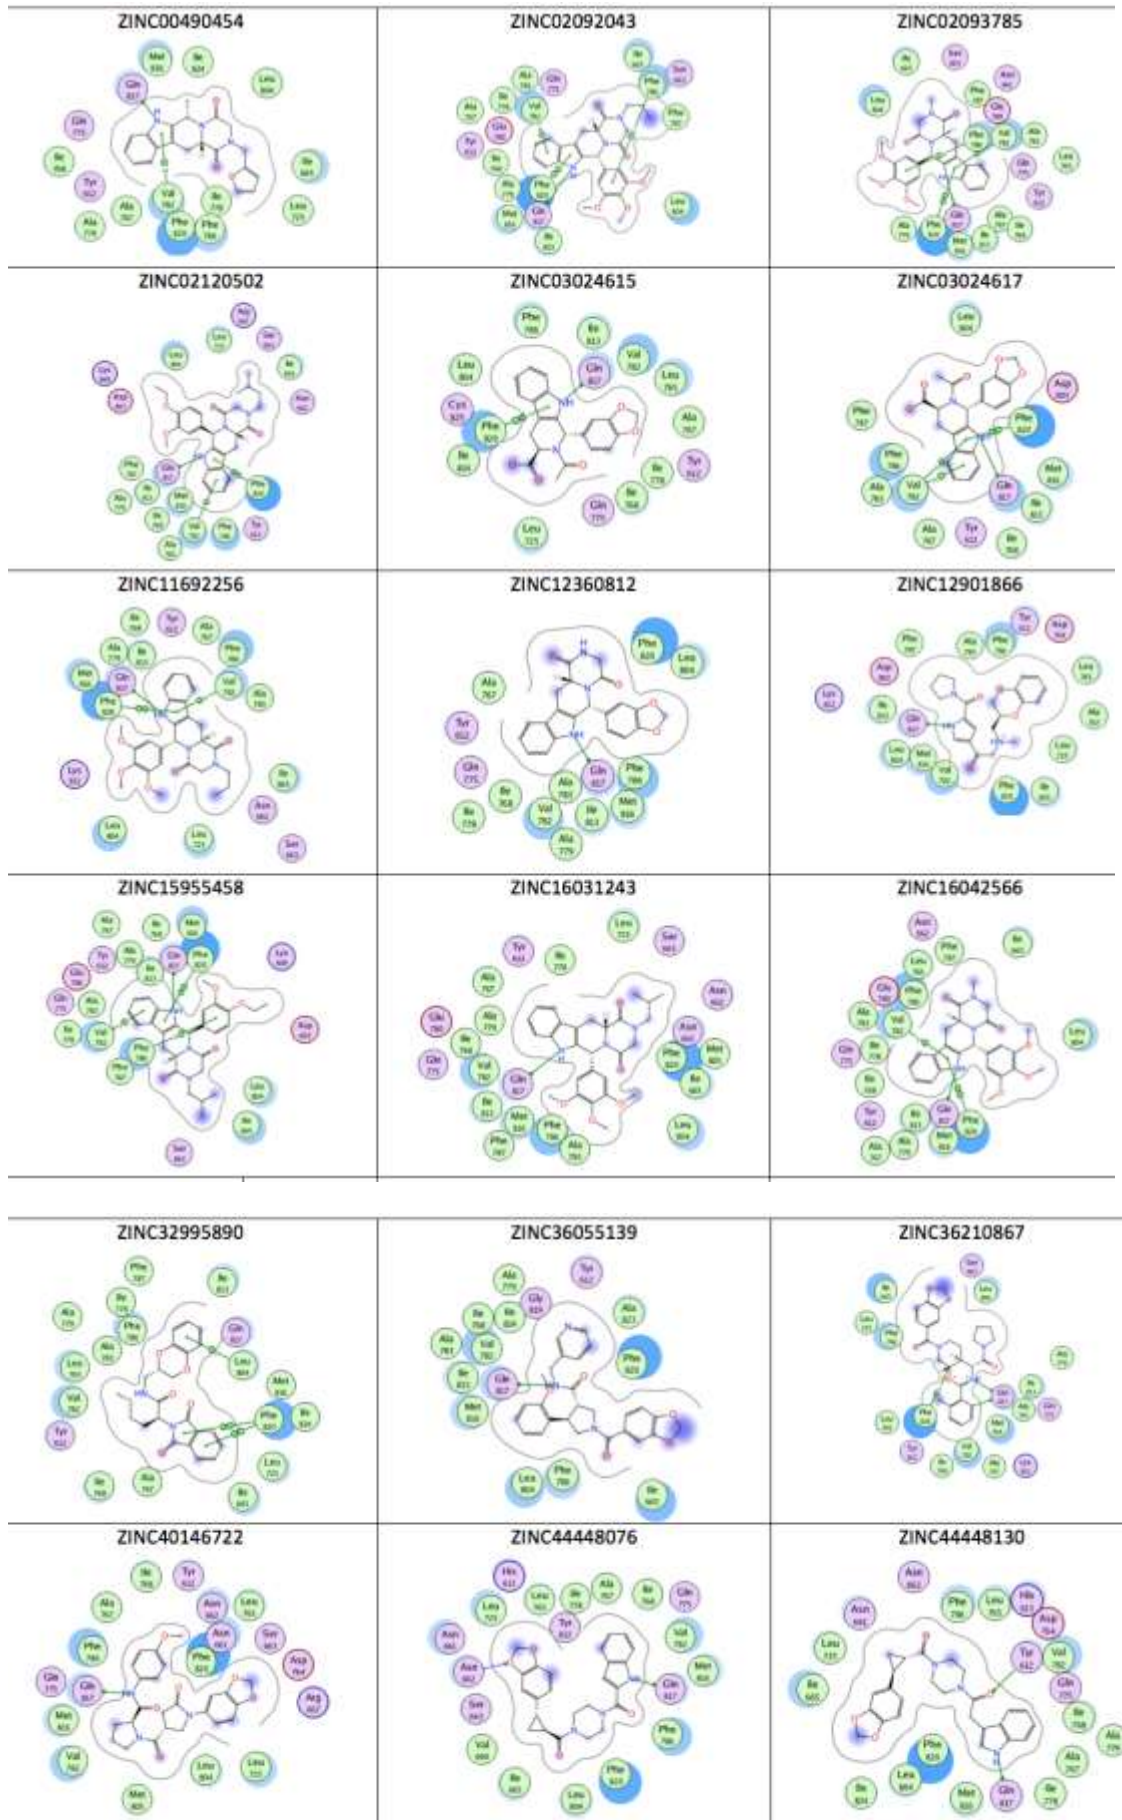

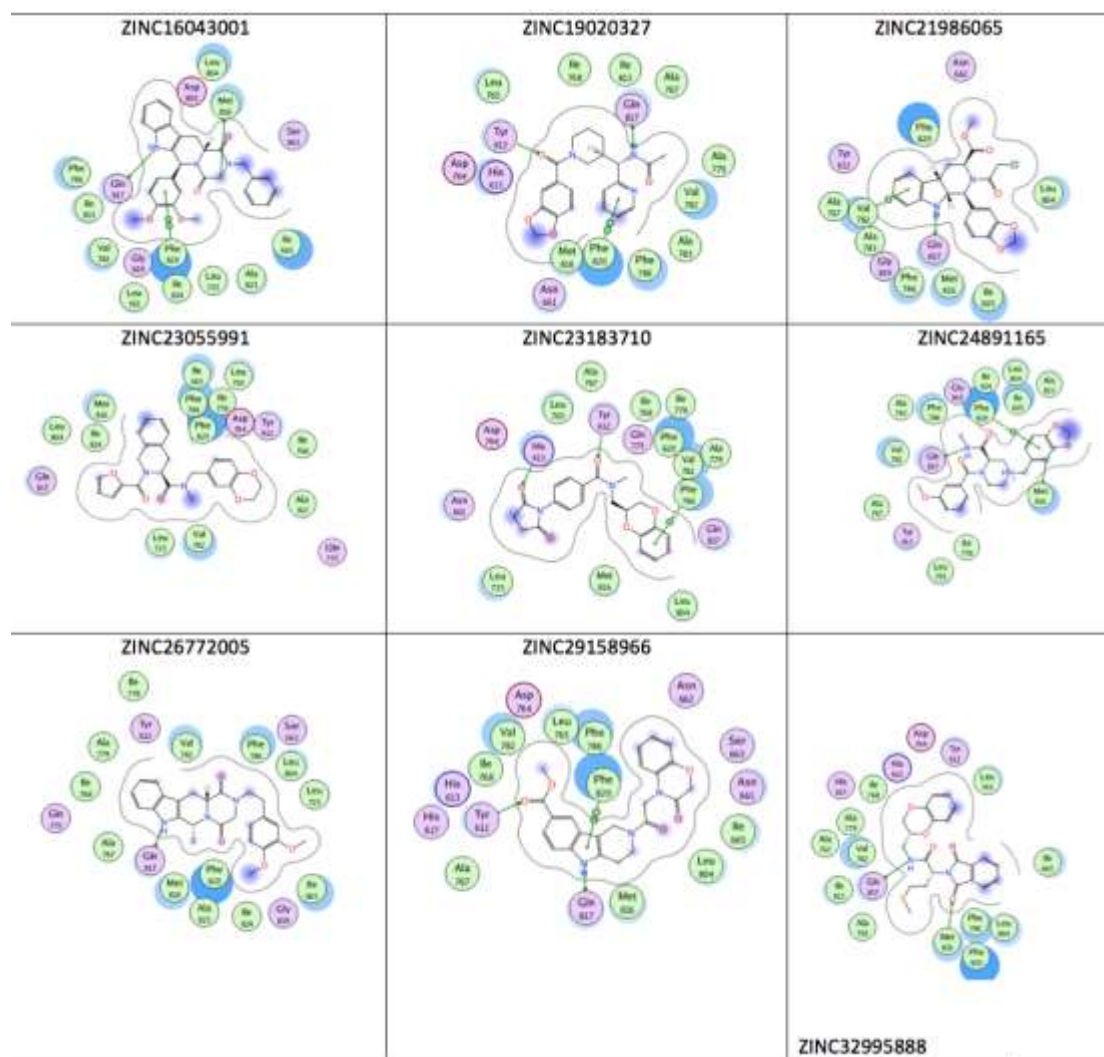

**Figure S4.** 2D protein-ligand interaction diagrams of the selected compounds (Table 1) with the catalytic site residues of PDE5.
